# Supplementary material for: Development of an immune-related gene pairs signature for predicting clinical outcome in lung adenocarcinoma
Source: PubMed Central journal article supplement (PMC7878883; doi:10.1038/s41598-021-83120-4), 2021-02-11
Supplement: 41598_2021_83120_MOESM1_ESM.pdf [file 41598_2021_83120_MOESM1_ESM.pdf]

# **Development of an immune-related gene pairs signature for predicting clinical outcome in lung adenocarcinoma**

Chunlei Wu<sup>1</sup>, Quanteng Hu<sup>1</sup>, & Dehua Ma<sup>\*</sup>

Department of Thoracic Surgery, Taizhou Hospital, Taizhou, Zhejiang, China

1 These authors contributed equally to this work.

\*Correspondence: Dehua Ma, Department of Thoracic Surgery, Taizhou Hospital, No. 150 Ximen street, Linhai, Taizhou, Zhejiang, China.

Email: [madh\\_tzyy@sina.com](mailto:madh_tzyy@sina.com)

Table S1. 22 pathways were enriched between high and low immune risk groups with GSEA.

| Group                             | Pathway                                      | ES     | NES    | Gene count | P-adjusted |
|-----------------------------------|----------------------------------------------|--------|--------|------------|------------|
| High-risk group                   | Cell cycle                                   | 0.636  | 2.380  | 114        | 0.005      |
|                                   | P53 signaling pathway                        | 0.624  | 2.111  | 60         | 0.005      |
|                                   | Proteasome                                   | 0.677  | 2.094  | 39         | 0.005      |
|                                   | Homologous recombination                     | 0.697  | 1.961  | 25         | 0.005      |
|                                   | DNA replication                              | 0.720  | 2.168  | 34         | 0.005      |
|                                   | Mismatch repair                              | 0.714  | 1.944  | 22         | 0.007      |
|                                   | Spliceosome                                  | 0.467  | 1.709  | 100        | 0.012      |
|                                   | Pyrimidine metabolism                        | 0.485  | 1.702  | 76         | 0.016      |
|                                   | Pathways in cancer                           | 0.345  | 1.460  | 303        | 0.018      |
| Low-risk group                    | T cell receptor signaling pathway            | -0.444 | -1.716 | 103        | 0.002      |
|                                   | Chemokine signaling pathway                  | -0.356 | -1.475 | 165        | 0.002      |
|                                   | Intestinal immune network for IgA production | -0.612 | -1.935 | 41         | 0.007      |
|                                   | Cell adhesion molecules cams                 | -0.453 | -1.711 | 115        | 0.007      |
|                                   | Allograft rejection                          | -0.628 | -1.894 | 33         | 0.009      |
|                                   | Vascular smooth muscle contraction           | -0.497 | -1.824 | 95         | 0.009      |
|                                   | PPAR signaling pathway                       | -0.542 | -1.854 | 61         | 0.012      |
|                                   | Complement and coagulation cascades          | -0.505 | -1.748 | 66         | 0.020      |
|                                   | Hematopoietic cell lineage                   | -0.467 | -1.677 | 82         | 0.024      |
|                                   | Lysosome                                     | -0.439 | -1.636 | 105        | 0.024      |
|                                   | Primary immunodeficiency                     | -0.595 | -1.793 | 33         | 0.024      |
| B cell receptor signaling pathway | -0.477                                       | -1.670 | 71     | 0.028      |            |
| FC epsilon RI signaling pathway   | -0.457                                       | -1.603 | 72     | 0.046      |            |

Abbreviations: GSEA: Gene set enrichment analysis; ES: enrichment score; NES: Normalized enrichment score.

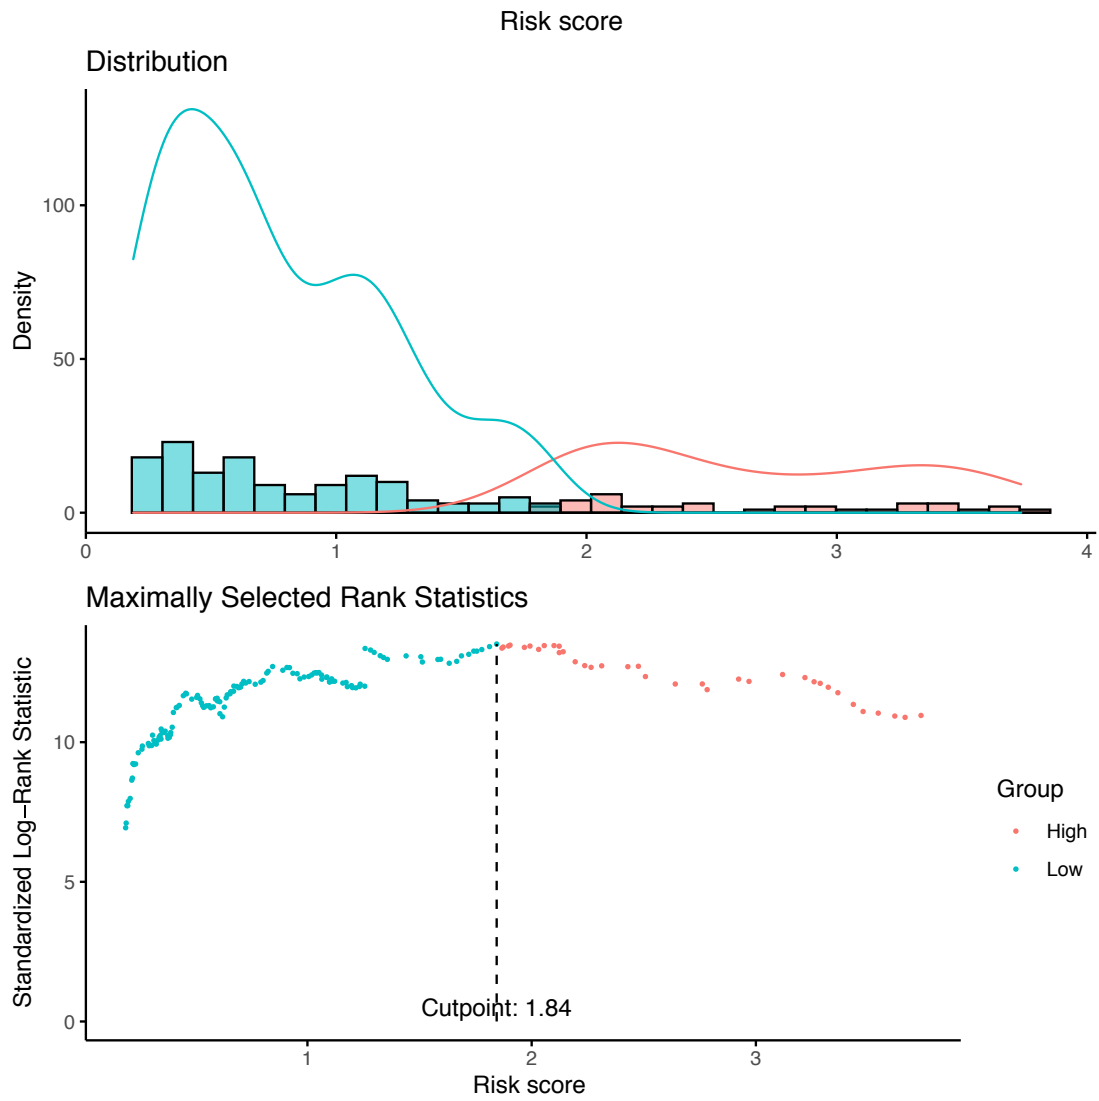

Figure S1. Determination of optimal cut-off value of immune risk score in TCGA set with R package 'Survminer'.

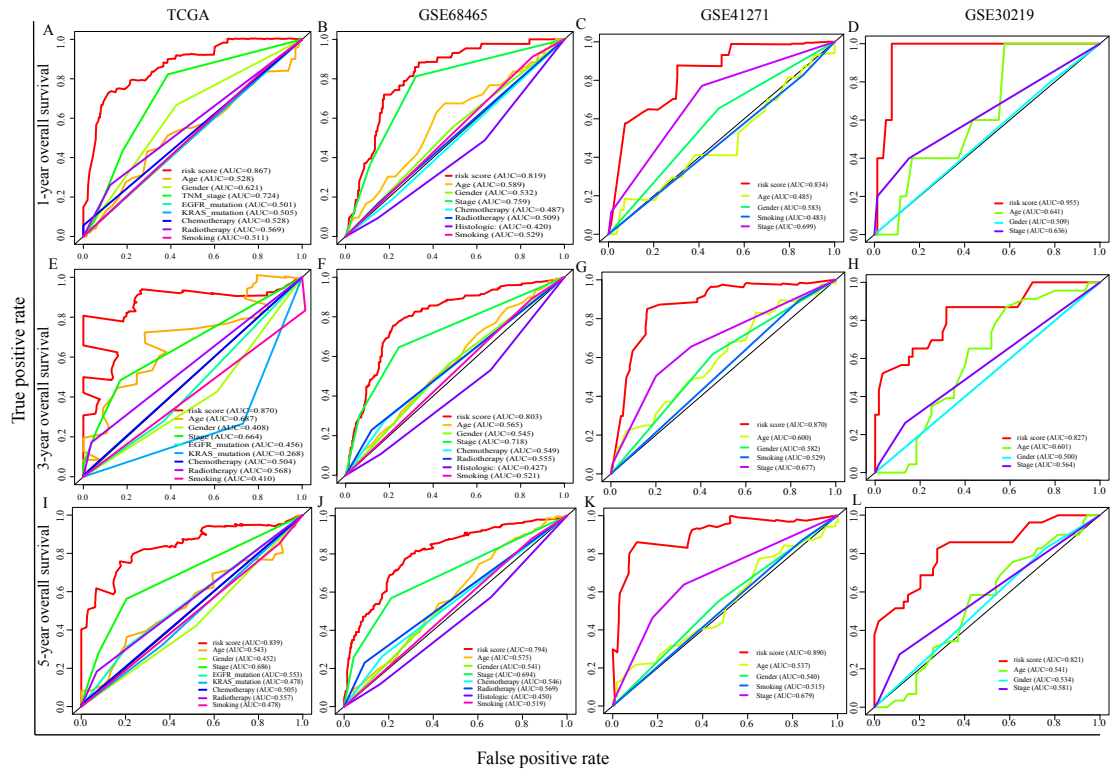

Figure S2. Evaluation of IRGPs signature. (A) The area under the receiver operating characteristic (ROC) curve (AUC) for 1-year overall survival of LUAD patients in TCGA set, (B) in GEO set 1, (C) in GEO set 2, (D) in GEO set 3. (E) The AUC for 3-year overall survival in TCGA set, (F) in GEO set 1, (G) in GEO set 2, (H) in GEO set 3. (I) The AUC for 5-year overall survival in TCGA set, (J) in GEO set 1, (K) in GEO set 2, (L) in GEO set 3.

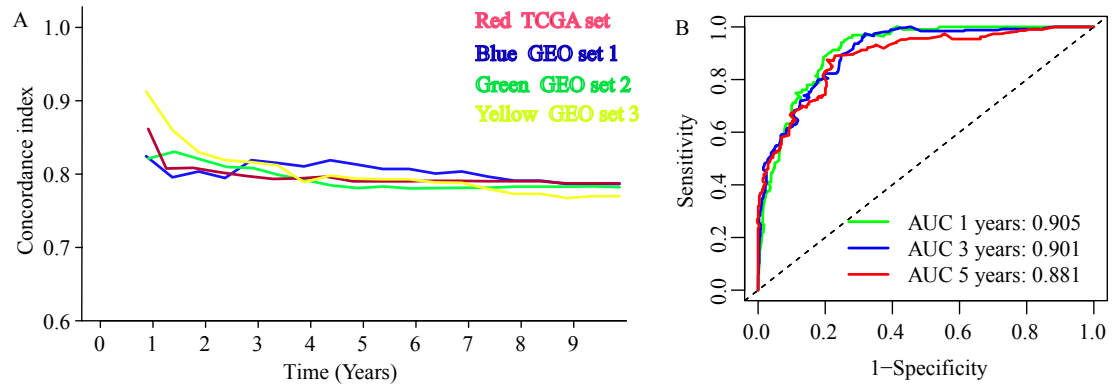

Figure S3. (A) Time dependent c-index in four sets. (B) The AUCs of the nomogram for predicting 1- and 3-year survival probability.

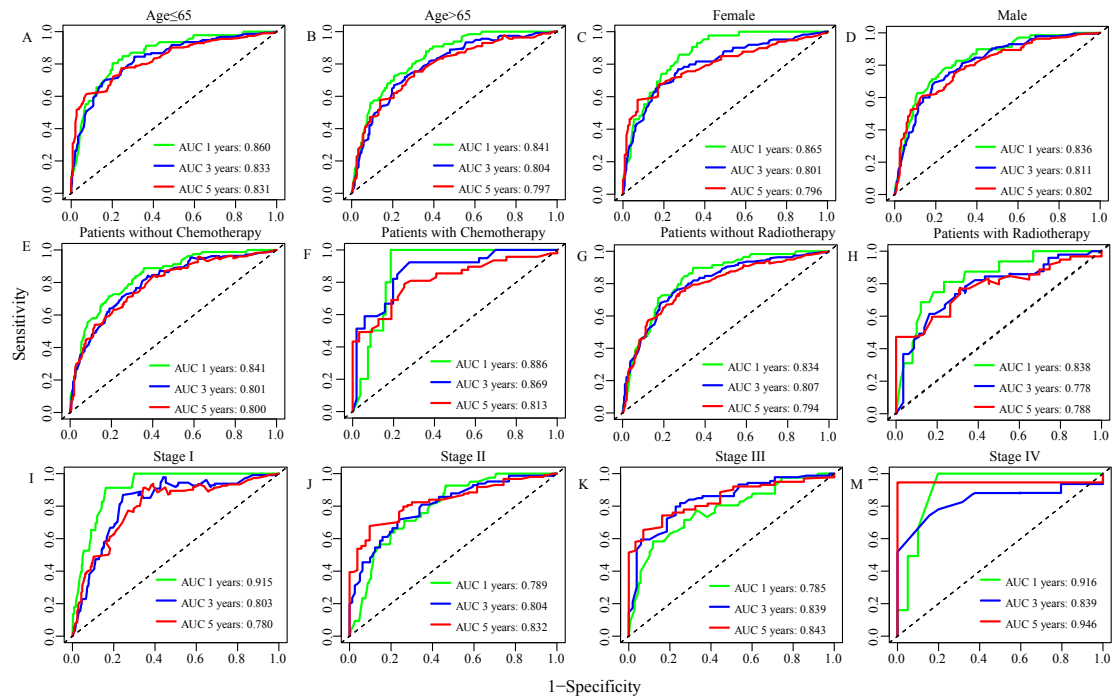

Figure S4. Stratification analyses of the AUCs of the IRGPs signature in each subgroup. (A) Age ≤ 65. (B) Age > 65. (C) Female. (D) Male. (E) Patients without Chemotherapy. (F) Patients with Chemotherapy. (G) Patients without Radiotherapy. (H) Patients with Radiotherapy. (I) TNM stage I. (J) TNM stage II. (K) TNM stage III. (L) TNM stage IV.

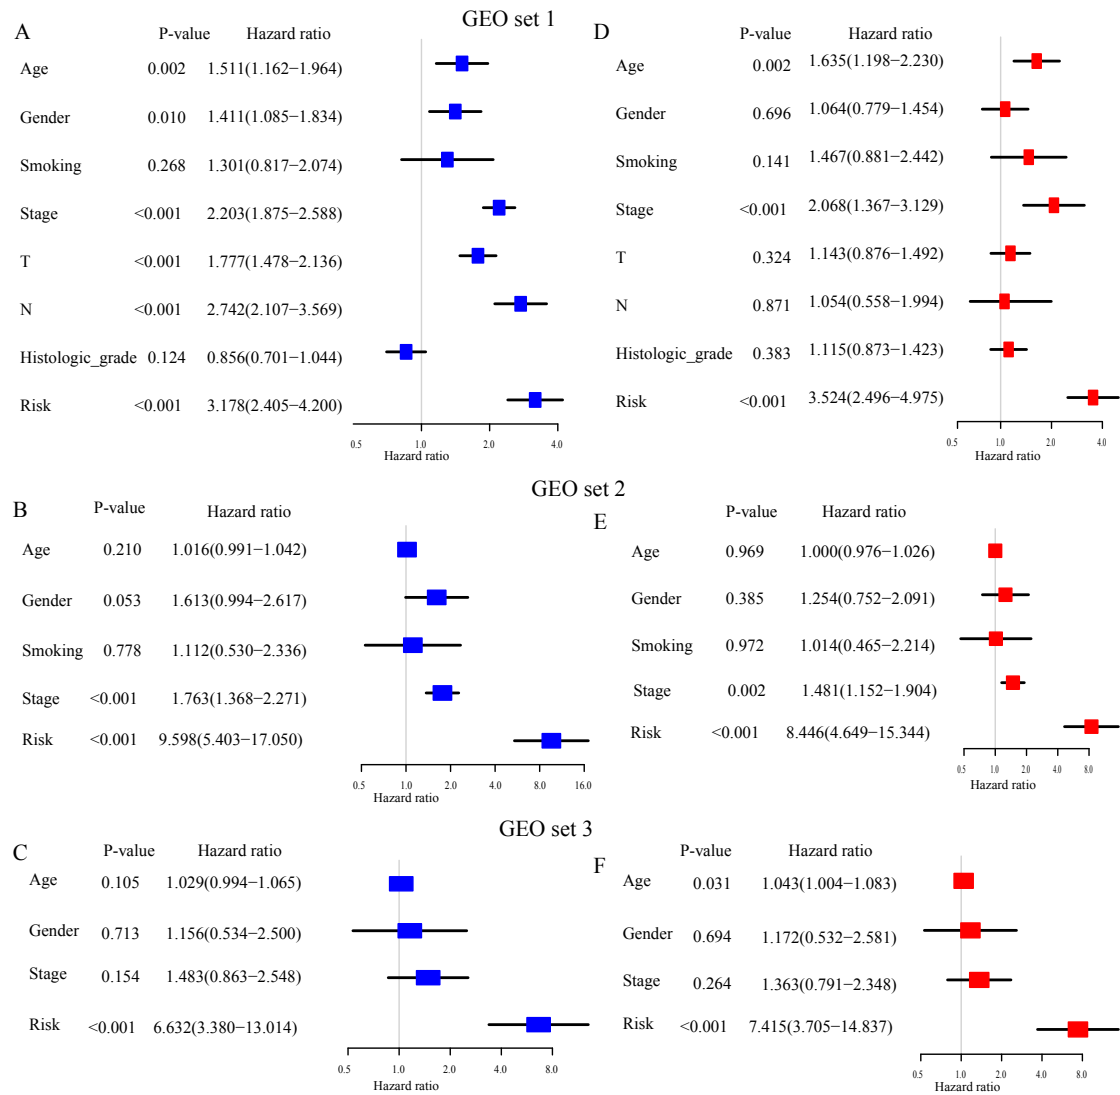

Figure S5. Validation of the IRGPs signature as an independent prognostic factor for the prognosis of LUAD patients. (A) The result of univariable Cox regression analysis in the GEO set 1. (B) in the GEO set 2. (C) in the GEO set 3. (D) The result of multivariable Cox regression analysis in the GEO set 1. (E) in the GEO set 2. (F) in the GEO set 3.

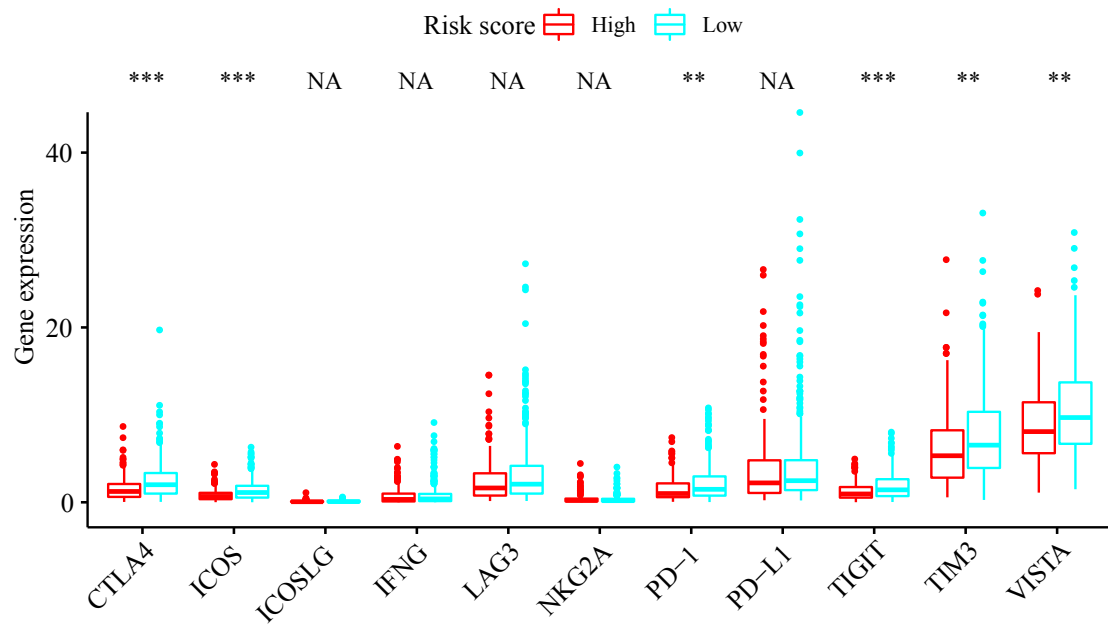

Figure S6. The difference of distribution of 11 immunomodulators between high- and low- risk LUAD patients. \*\* P<0.01, \*\*\*P<0.001.
